# Supplementary material for: A rapid and simple colorimetric test for 2,2,2-cryptand (Kryptofix 2.2.2.) in solution
Source: Royal Society of Chemistry journal article supplement (doi:10.1039/c3ay40995c), 2013-01-01
Supplement: c3ay40995c.pdf [file c3ay40995c.pdf]

## Supporting Information

### Rapid and simple colorimetric test for 2,2,2-Cryptand (Kryptofix 2.2.2.) in solution.

Atilio I. Anzellotti\*, Aaron R. McFarland and Ken F. Olson

ABT Molecular Imaging Inc., R&D, Louisville, TN 37777, US

*e-mail:* [aanzellotti@abt-mi.com](mailto:aanzellotti@abt-mi.com)

#### Optical Microscopy:

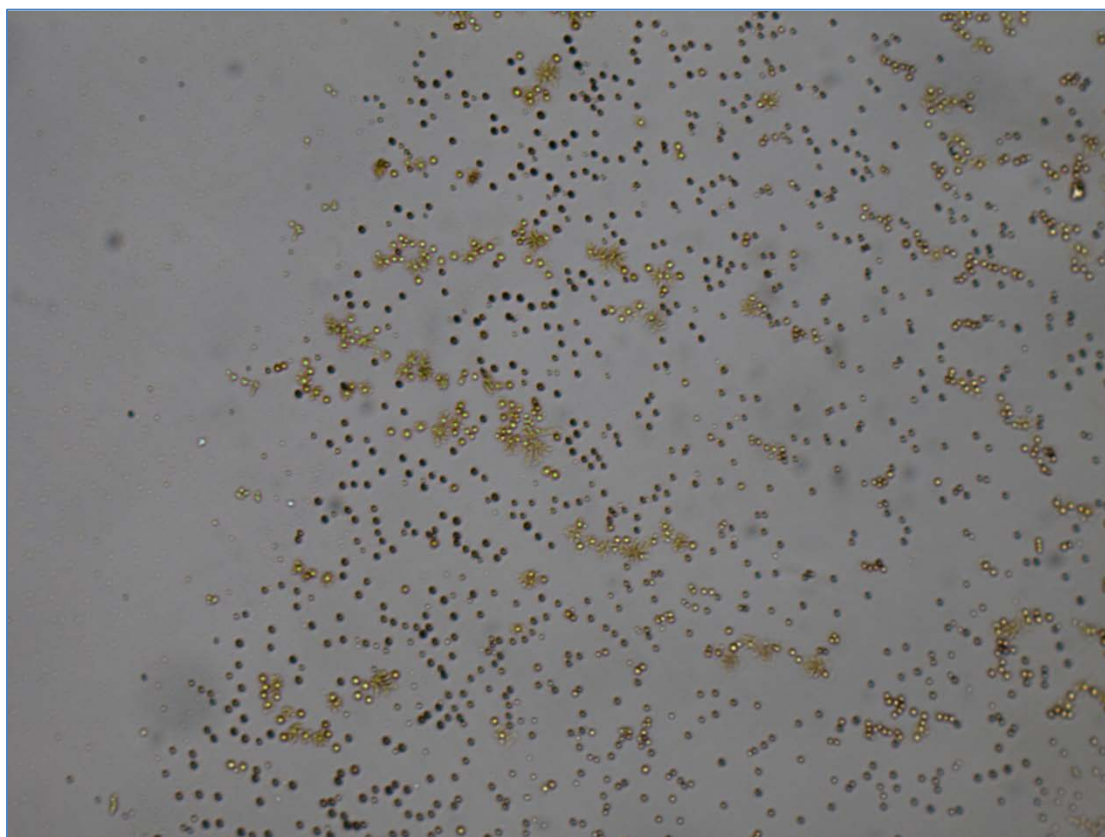

**Figure S1:** optical microphotograph of the suspension formed when  $I_2/I^-$  is mixed with 2,2,2-Cryptand solution (50 ppm).

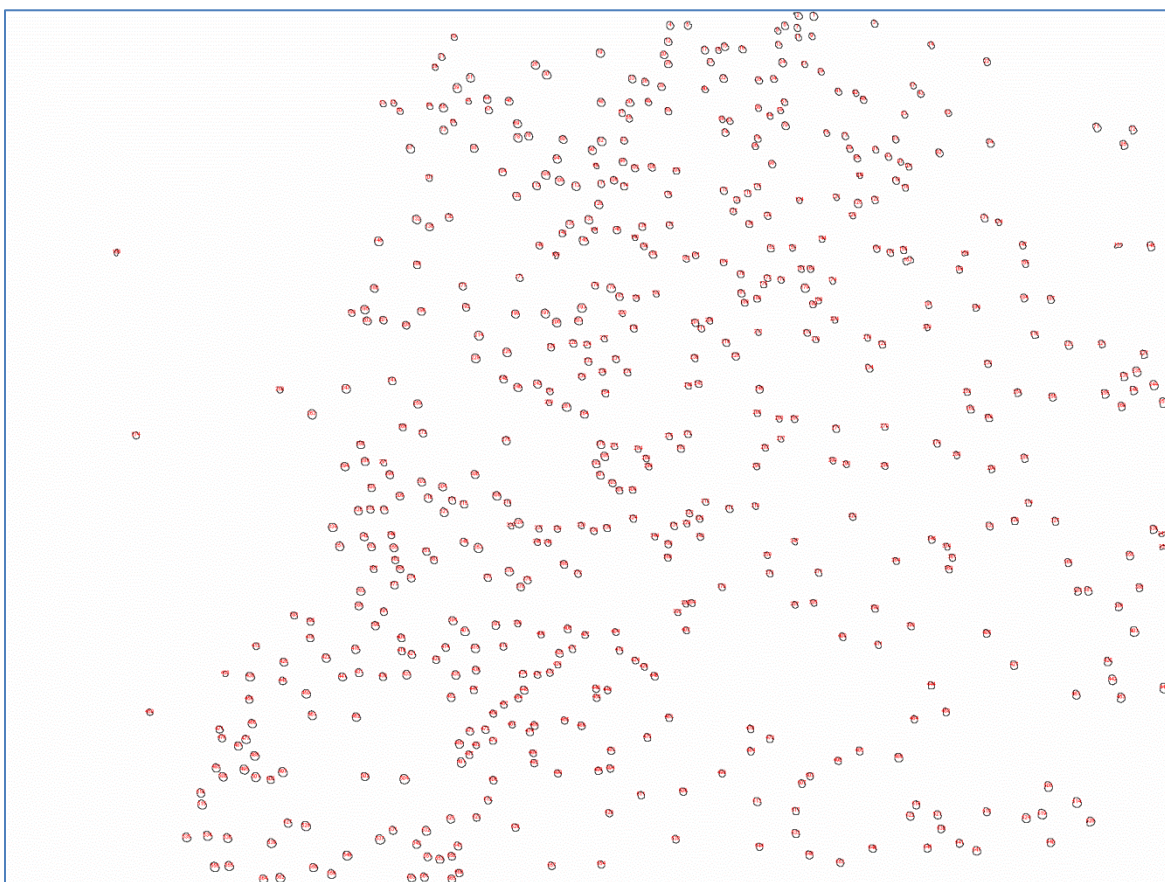

**Figure S2:** Example of the particle sampling plan used for particle size measurement applied to the microphotograph showed in S1.

## Scanning Electronic Microscopy

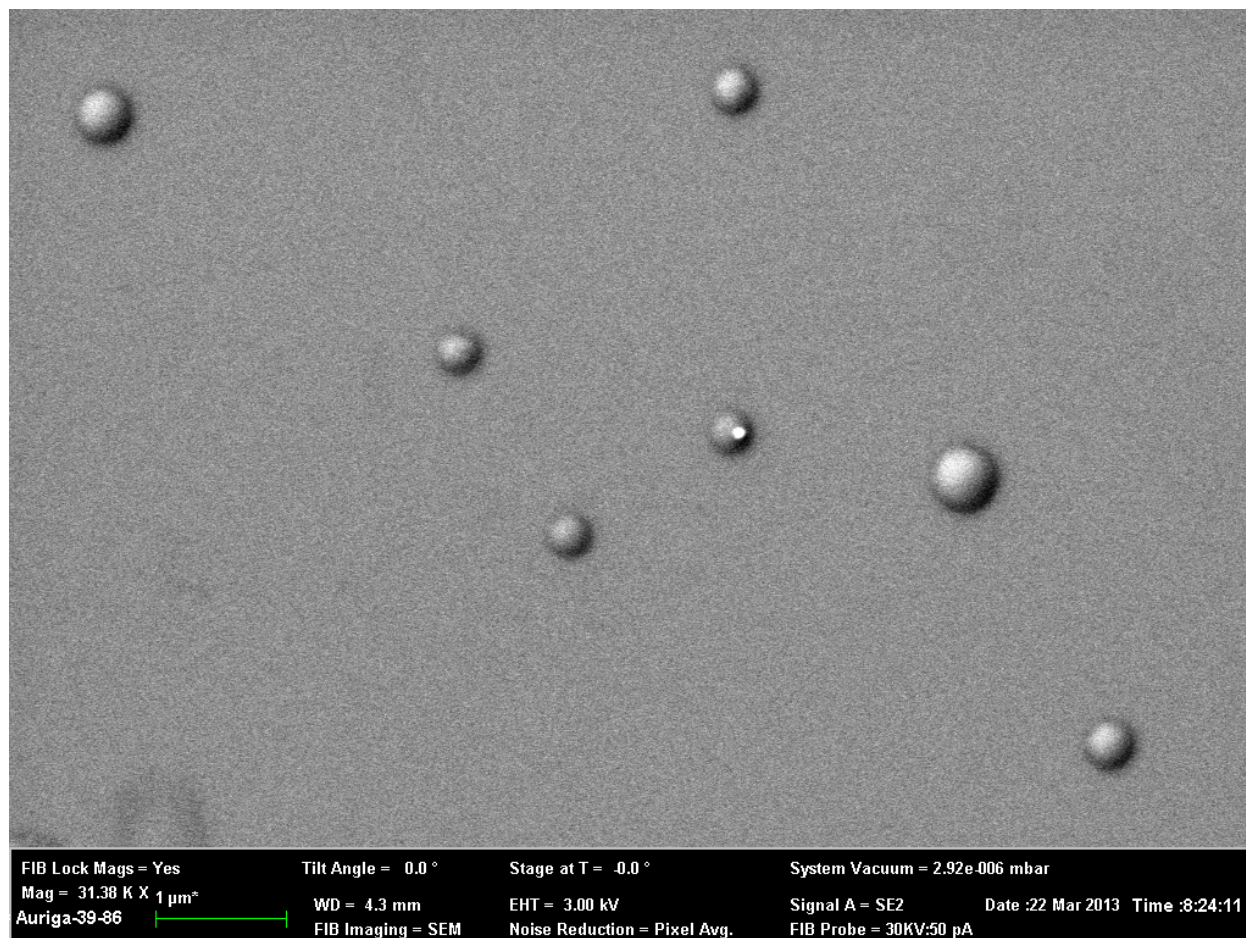

**Figure S3:** Example of the SEM microphotograph from the suspension formed when I<sub>2</sub>/I<sup>-</sup> is mixed with 2,2,2-Cryptand solution (50 ppm).



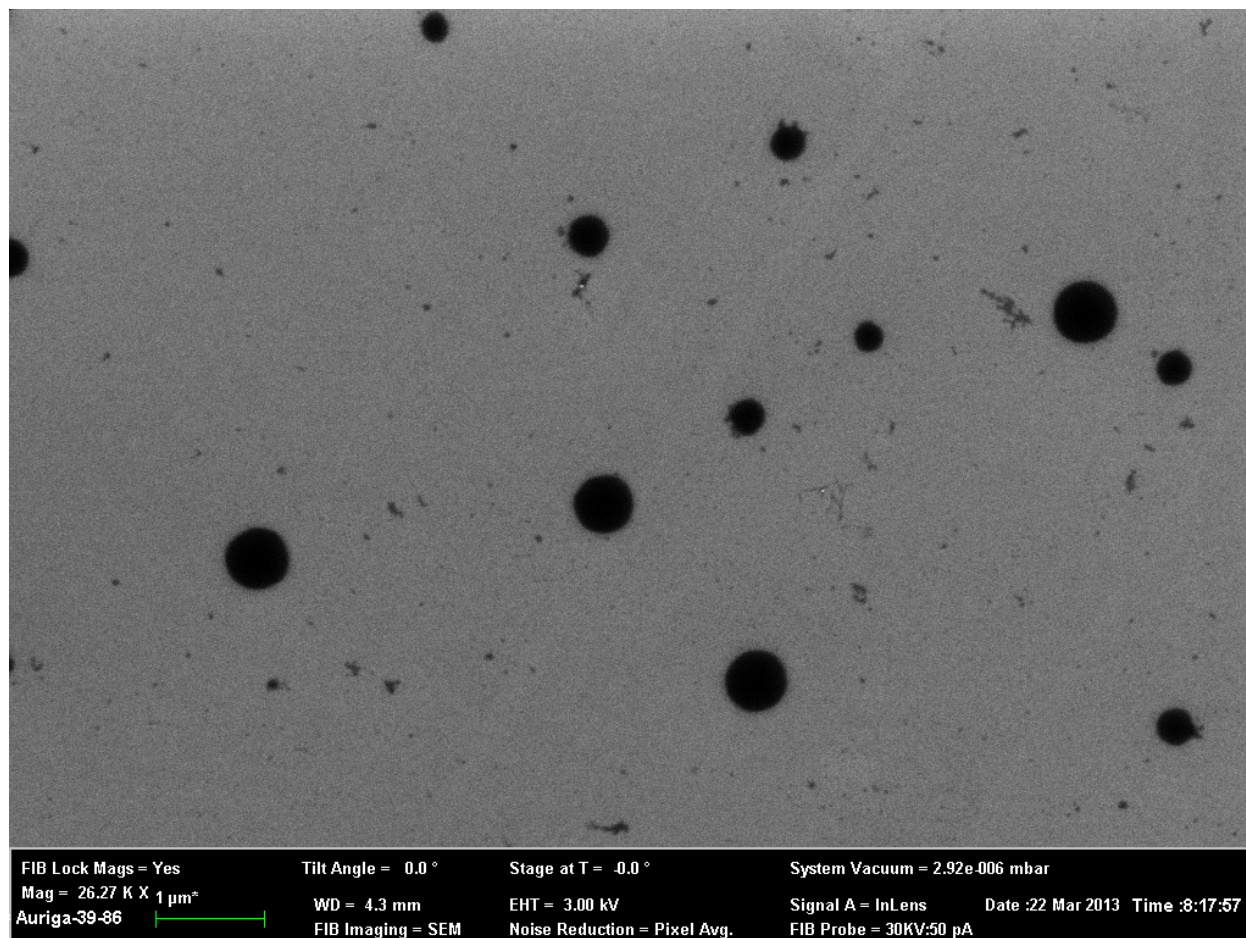

**Figure S4:** Another view SEM microphotograph from the suspension formed when I<sub>2</sub>/I<sup>-</sup> is mixed with 2,2,2-Cryptand solution (50 ppm).

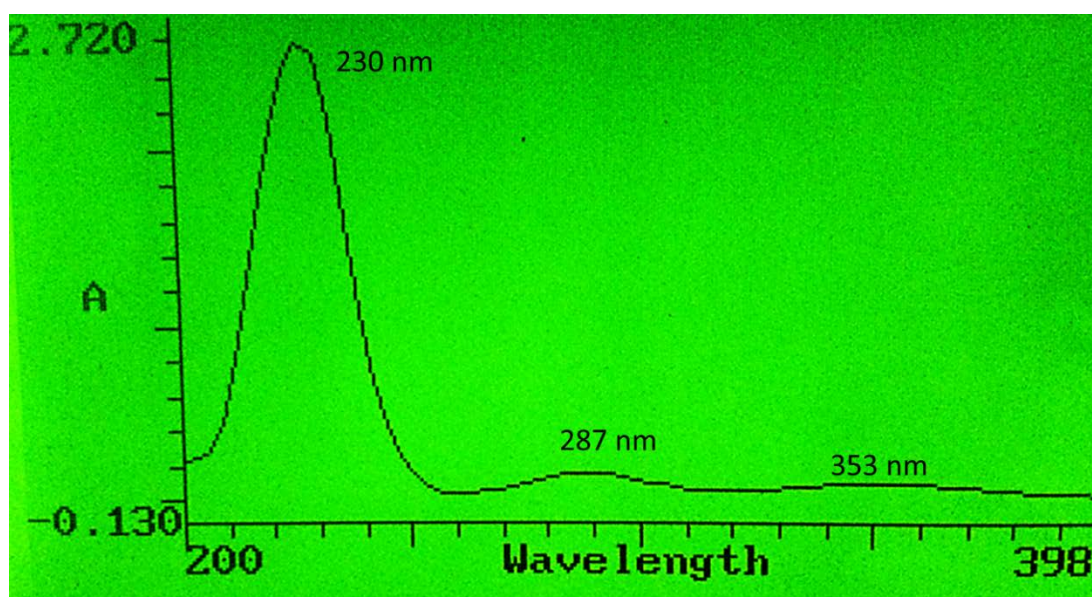

**Figure S5:** UV-vis spectrum for the  $I_2/I^-$  solution prior to mixture with 2,2,2-Cryptand solution.
